# Supplementary material for: Does Better Diet Quality Offset the Association between Depression and Metabolic Syndrome?
Source: MDPI journal article supplement (doi:10.3390/nu15041060), 2023-02-20
Supplement: s1 [file s1]

**Supplementary Table S1.** Mediating effects of diet quality on the association between depression severity and metabolic syndrome

| Metabolic syndrome                               |                        |                        |                                |
|--------------------------------------------------|------------------------|------------------------|--------------------------------|
|                                                  | Model 1<br>X -> Y      | Model 2<br>X + M -> Y  | Proportion of<br>mediation     |
| Depression severity<br>(Independent Variable, X) | 1.47<br>(1.17-1.86) ** | 1.02<br>(1.00-1.03) *  |                                |
| Adequacy item<br>(Mediator, M)                   |                        | 0.87<br>(0.75 – 1.00)  |                                |
| Depression severity<br>(Independent Variable, X) | 1.47<br>(1.17-1.86) ** | 1.47<br>(1.17-1.87) ** | Fail to meet<br>the conditions |
| Moderation item<br>(Mediator, M)                 |                        | 1.12<br>(0.96 – 1.32)  |                                |
| Depression severity<br>(Independent Variable, X) | 1.47<br>(1.17-1.86) ** | 1.48<br>(1.17-1.87) ** |                                |
| Balance item<br>(Mediator, M)                    |                        | 1.06<br>(0.93-1.21)    |                                |

Values are presented as adjusted odds ratios (95% confidence intervals) adjusted for age, sex, body mass index, education level, drinking consumption, energy intake, and physical activity. \* $p < 0.05$ . \*\* $p < 0.01$ .

**Supplementary Table S2.** Mediating effects of fulfilling subcomponents of Korean Healthy Eating Index on the association between depression severity and metabolic syndrome

|                                                                              | Metabolic syndrome<br>(Dependent variable, Y) |                        |                                |
|------------------------------------------------------------------------------|-----------------------------------------------|------------------------|--------------------------------|
|                                                                              | Model 1<br>X -> Y                             | Model 2<br>X + M -> Y  | Proportion of<br>mediation     |
| Depression severity<br>(Independent Variable, X)                             | 1.47<br>(1.17-1.86) **                        | 1.46<br>(1.16-1.85) ** |                                |
| Have breakfast (Mediator, M)                                                 |                                               | 0.89<br>(0.78-1.01)    | Fail to meet<br>the conditions |
| Depression severity<br>(Independent Variable, X)                             | 1.47<br>(1.17-1.86) **                        | 1.47<br>(1.17-1.86) ** |                                |
| Mixed grain intake<br>(Mediator, M)                                          |                                               | 0.92<br>(0.81-1.04)    |                                |
| Depression severity<br>(Independent Variable, X)                             | 1.47<br>(1.17-1.86) **                        | 1.47<br>(1.16-1.86) ** | Fail to meet<br>the conditions |
| Total fruits intake<br>(Mediator, M)                                         |                                               | 0.79<br>(0.71-0.90) ** | (because of<br>X->M: p=0.172)  |
| Depression severity<br>(Independent Variable, X)                             | 1.47<br>(1.17-1.86) **                        | 1.47<br>(1.16-1.86) ** | Fail to meet<br>the conditions |
| Fresh fruits intake<br>(Mediator, M)                                         |                                               | 0.81<br>(0.73-0.91) ** | (because of<br>X->M: p=0.247)  |
| Depression severity<br>(Independent Variable, X)                             | 1.47<br>(1.17-1.86) **                        | 1.48<br>(1.17-1.87) ** |                                |
| Total vegetables intake<br>(Mediator, M)                                     |                                               | 1.13<br>(1.01-1.27) *  | 63.3%                          |
| Depression severity<br>(Independent Variable, X)                             | 1.47<br>(1.17-1.86) **                        | 1.48<br>(1.17-1.87) ** |                                |
| Vegetable intake excluding<br>kimchi and pickled vegetables<br>(Mediator, M) |                                               | 1.14<br>(1.01-1.28) *  | 66.3%                          |
| Depression severity<br>(Independent Variable, X)                             | 1.47<br>(1.17-1.86) **                        | 1.47<br>(1.17-1.86) ** |                                |
| Meats/fishes/eggs/beans intake<br>(Mediator, M)                              |                                               | 0.99<br>(0.88-1.11)    |                                |
| Depression severity<br>(Independent Variable, X)                             | 1.47<br>(1.17-1.86) **                        | 1.44<br>(1.11-1.86)    |                                |
| Milk and dairy product intake<br>(Mediator, M)                               |                                               | 0.91<br>(0.81-1.03)    |                                |
| Depression severity<br>(Independent Variable, X)                             | 1.47<br>(1.17-1.86) **                        | 1.47<br>(1.17-1.86) ** | Fail to meet<br>the conditions |
| Energy from saturated fatty acid<br>(Mediator, M)                            |                                               | 1.07<br>(0.95-1.20)    |                                |
| Depression severity<br>(Independent Variable, X)                             | 1.47<br>(1.17-1.86) **                        | 1.46<br>(1.16-1.85) ** |                                |
| Sodium intake<br>(Mediator, M)                                               |                                               | 1.09<br>(0.95-1.26)    |                                |
| Depression severity<br>(Independent Variable, X)                             | 1.47<br>(1.17-1.86) **                        | 1.48<br>(1.17-1.87) ** |                                |
| Energy from sweets/beverages<br>(Mediator, M)                                |                                               | 1.11<br>(0.97-1.27)    |                                |

|                                                  |                        |                        |
|--------------------------------------------------|------------------------|------------------------|
| Depression severity<br>(Independent Variable, X) | 1.47<br>(1.17-1.86) ** | 1.47<br>(1.17-1.86) ** |
| Energy from carbohydrate<br>(Mediator, M)        |                        | 1.02<br>(0.91-1.15)    |
| Depression severity<br>(Independent Variable, X) | 1.47<br>(1.17-1.86) ** | 1.47<br>(1.17-1.86) ** |
| Energy from fat<br>(Mediator, M)                 |                        | 0.96<br>(0.87-1.07)    |
| Depression severity<br>(Independent Variable, X) | 1.47<br>(1.17-1.86) ** | 1.47<br>(1.16-1.86) ** |
| Total energy intake<br>(Mediator, M)             |                        | 1.00<br>(0.89-1.11)    |

KHEI: Korean Healthy Eating Index. Values are presented as adjusted odds ratios (95% confidence intervals) adjusted for age, sex, body mass index, education level, drinking consumption, energy intake, and physical activity. \* $p < 0.05$ . \*\* $p < 0.01$

**Supplementary Table S3.** Scores of Korean healthy eating index of subjects according to fulfilling both vegetable intake subcomponents

|                                                          | Full scores of both vegetable intake subcomponents |                 |                 |
|----------------------------------------------------------|----------------------------------------------------|-----------------|-----------------|
|                                                          | No<br>(N =10,353)                                  | Yes<br>(N=3186) | <i>p</i> -value |
| Total score                                              | 61.90±0.17                                         | 66.53±0.26      | <0.001          |
| Adequacy item                                            |                                                    |                 |                 |
| Have breakfast                                           | 7.00±0.05                                          | 7.61±0.08       | <0.001          |
| Mixed grain intake                                       | 1.96±0.03                                          | 2.33±0.05       | <0.001          |
| Total fruits intake                                      | 2.19±0.03                                          | 2.26±0.04       | 0.156           |
| Fresh fruits intake                                      | 2.39±0.03                                          | 2.43±0.05       | 0.371           |
| Total vegetables intake                                  | 3.13±0.02                                          | Full score (5)  | <0.001          |
| Vegetable intake excluding kimchi and pickled vegetables | 2.78±0.02                                          | Full score (5)  | <0.001          |
| Meats/fishes/eggs/beans intake                           | 7.03±0.04                                          | 7.60±0.05       | <0.001          |
| Milk and dairy product intake                            | 3.43±0.06                                          | 2.97±0.10       | <0.001          |
| Moderation item                                          |                                                    |                 |                 |
| Energy from saturated fatty acid                         | 7.26±0.05                                          | 8.11±0.08       | <0.001          |
| Sodium intake                                            | 6.82±0.03                                          | 5.37±0.06       | <0.001          |
| Energy from sweets/beverages                             | 9.07±0.03                                          | 9.30±0.04       | <0.001          |
| Balance item                                             |                                                    |                 |                 |
| Energy from carbohydrate                                 | 2.46±0.02                                          | 2.64±0.05       | 0.001           |
| Energy from fat                                          | 3.29±0.02                                          | 3.45±0.04       | 0.002           |
| Total energy intake                                      | 3.09±0.03                                          | 2.95±0.05       | <0.001          |

Values are presented as mean ± standard error. <sup>a-c</sup>Significantly different at  $p < 0.05$ . Adjusted for age, sex, body mass index, education level, alcohol drinking consumption, energy intake, disease history, and physical activity.

**Supplementary Table S4.** Nutrient intakes of subjects according to fulfilling both vegetable intake subcomponents

|                               | Full scores of both vegetable intake subcomponents |                 | <i>p</i> -value |
|-------------------------------|----------------------------------------------------|-----------------|-----------------|
|                               | No<br>(N =10,353)                                  | Yes<br>(N=3186) |                 |
| Protein, g                    | 72.16±0.31                                         | 80.79±0.63      | <0.001          |
| Fat, g                        | 47.56±0.30                                         | 47.51±0.59      | 0.948           |
| Saturated fatty acid, g       | 15.20±0.13                                         | 13.42±0.21      | <0.001          |
| Monounsaturated fatty acid, g | 15.26±0.12                                         | 15.26±0.25      | 0.994           |
| Polyunsaturated fatty acid, g | 11.79±0.09                                         | 13.49±0.20      | <0.001          |
| n-3 fatty acid, g             | 1.72±0.02                                          | 2.22±0.04       | <0.001          |
| n-6 fatty acid, g             | 10.07±0.08                                         | 11.30±0.17      | <0.001          |
| Cholesterol, mg               | 254.14±2.59                                        | 270.14±5.19     | 0.008           |
| Carbohydrate, g               | 303.42±1.08                                        | 315.93±1.87     | <0.001          |
| Total fiber, g                | 23.10±0.15                                         | 31.93±0.28      | <0.001          |
| Calcium, mg                   | 489.43±3.53                                        | 609.24±8.03     | <0.001          |
| Phosphate, mg                 | 1059.75±3.64                                       | 1249.42±7.85    | <0.001          |
| Iron, mg                      | 13.11±0.19                                         | 17.19±0.28      | <0.001          |
| Sodium, mg                    | 3436.02±22.38                                      | 4413.68±51.64   | <0.001          |
| Potassium, mg                 | 2747.78±12.47                                      | 3680.09±27.27   | <0.001          |
| Carotene, µg                  | 2514.64±52.24                                      | 5331.41±133.37  | <0.001          |
| Retinol, µg                   | 151.51±5.90                                        | 139.69±17.14    | 0.543           |
| Thiamin, mg                   | 1.50±0.01                                          | 1.91±0.02       | <0.001          |
| Riboflavin, mg                | 1.15±0.01                                          | 1.78±0.02       | <0.001          |
| Niacin, mg                    | 14.28±0.07                                         | 17.02±0.17      | <0.001          |
| Vitamin C, mg                 | 66.30±1.25                                         | 105.67±2.20     | <0.001          |

Values are presented as mean ± standard error. <sup>a-c</sup> Significantly different at *p* < 0.05. Adjusted for age, sex, body mass index, education level, alcohol drinking consumption, energy intake, disease history, and physical activity.

**Supplementary Table S5.** Adjusted odds ratios (95% confidence intervals) for risks of metabolic syndrome and its components of subjects according to depression severity after stratified by full scores of both vegetable intake subcomponents measured by Korean Healthy Eating Index

|                                   | Full scores of both vegetable intake subcomponents |                          |                                    |                   |                           |                         |                                    |                   |
|-----------------------------------|----------------------------------------------------|--------------------------|------------------------------------|-------------------|---------------------------|-------------------------|------------------------------------|-------------------|
|                                   | No<br>(N=10,353)                                   |                          |                                    |                   | Yes<br>(N=3186)           |                         |                                    |                   |
|                                   | PHQ-9 depression severity                          |                          |                                    |                   | PHQ-9 depression severity |                         |                                    |                   |
|                                   | Normal<br>(N=8233)                                 | Mild<br>(N = 1501)       | Moderate<br>to severe<br>(N = 619) | <i>p</i><br>trend | Normal<br>(N=2655)        | Mild<br>(N = 404)       | Moderate<br>to severe<br>(N = 127) | <i>p</i><br>trend |
| Metabolic syndrome                |                                                    | 1.05<br>(0.88 – 1.25)    | 1.49<br>(1.14 – 1.94) **           | 0.007             |                           | 0.89<br>(0.66 – 1.20)   | 1.45<br>(0.89 – 2.35)              | 0.573             |
| Abdominal obesity <sup>1</sup>    |                                                    | 1.19<br>(0.92 – 1.53)    | 1.06<br>(0.74 – 1.51) *            | 0.301             |                           | 0.95<br>(0.60 – 1.49)   | 1.53<br>(0.74 – 3.18)              | 0.492             |
| Hypertriglyceridemia <sup>2</sup> | 1<br>(Reference)                                   | 1.15<br>(0.99 – 1.33) *  | 1.32<br>(1.05 – 1.64) **           | 0.005             | 1<br>(Reference)          | 1.11<br>(0.85 – 1.45) * | 1.26<br>(0.75 – 2.10)              | 0.258             |
| Low HDL cholesterol <sup>3</sup>  |                                                    | 1.23<br>(1.07 – 1.42) ** | 1.30<br>(1.04 – 1.63) *            | <0.001            |                           | 1.18<br>(0.89 – 1.57)   | 0.91<br>(0.59 – 1.40)              | 0.585             |
| High blood pressure <sup>4</sup>  |                                                    | 0.87<br>(0.74 – 1.02)    | 0.92<br>(0.72 – 1.17)              | 0.138             |                           | 0.76<br>(0.80 – 1.12)   | 0.80<br>(0.51 – 1.24)              | 0.047             |
| Hyperglycemia <sup>5</sup>        |                                                    | 0.96<br>(0.83 – 1.11)    | 1.22<br>(0.99 – 1.51)              | 0.242             |                           | 0.93<br>(0.71 – 1.22)   | 1.30<br>(0.78 – 2.18)              | 0.647             |

PHQ-9: Patient Health Questionnaire-9. PHQ-9 depression severity was divided by total scores of PHQ-9 (normal: <5, mild: 5-9, moderate to severe: ≥10). KHEI: Korean Healthy Eating Index. Diet quality level was divided into tertiles by total scores of KHEI (Low (T1): < 58, Medium (T2): 58-69, High (T3): ≥70). <sup>1</sup> Waist circumference ≥ 90cm for men, ≥ 80cm for women. <sup>2</sup> Serum triglyceride level ≥ 150 mg/dL or current drug treatment for high triglyceride. <sup>3</sup> HDL-cholesterol < 40mg/dL for men, 50mg/dL for women. <sup>4</sup> Systolic blood pressure > 130 mmHg or diastolic blood pressure > 85 mmHg or current drug treatment for hypertension. <sup>5</sup> Fasting blood glucose ≥ 100 mg/dL or current drug treatment for hypoglycemic agent or insulin. Values are presented as adjusted odds ratios (95% confidence intervals) adjusted for age, sex, body mass index, education level, drinking consumption, energy intake, and physical activity. \**p* < 0.05, \*\**p* < 0.01.
